# Supplementary material for: Synergistic effects of selenium nanoparticles and LED light on enhancement of secondary metabolites in sandalwood (Santalum album) plants through in-vitro callus culturing technique
Source: PeerJ. 2024 Sep 26;12:e18106. doi: 10.7717/peerj.18106 (PMC11439390; doi:10.7717/peerj.18106)
Supplement: Supplemental Information 2 [file peerj-12-18106-s002.xlsx]

## Sheet: Sheet2
			145 mg	47 mg	0.94	24..6	0.09 μg rutin equivalence/ mg)	20μg gallic acid equivalence/ mg)	9.7 μg saponin equivalence/ mg)	16.5 μg linalool equivalence / mg)	7.6μg catechin equivalence / mg)	2.4 μg catechin equivalence / mg)	%							0.6
	F1	F2	CFW	CDW	CMC	nosb/c	TFC	TPC	TSC	TTTC	t.flavanols	Tctc	PAL	SOD	POD	CAT	dpph	toco ug/g FW	antho mg/100 g FW	TiAC
T1	0	4	101	22	47.5	14.3	0.023	10.34	3.78	6.11	2.129	0.57	2.734	1.204	1.531	0.501	24	3.38	3.08	0.123
	0	4	103	22.5	47.8	14.7	0.027	10.59	3.81	6.36	2.159	0.61	2.779	1.21	1.535	0.51	23	3.32	3.12	0.132
	0	4	104	23.5	49	14.6	0.03	10.66	3.85	6.43	2.199	0.65	2.758	1.215	1.543	0.505	27	3.44	3.16	0.135
T2	1	4	105	26	51.7	16.2	0.032	12.32	4.11	8.09	2.459	0.69	2.903	1.221	1.562	0.521	30	3.52	3.2	0.167
	1	4	105.4	24.6	51	16.4	0.034	12.44	4.12	8.21	2.469	0.71	2.91	1.225	1.563	0.525	32	3.62	3.22	0.168
	1	4	106.5	25	52.4	16.9	0.035	12.51	4.16	8.28	2.509	0.74	2.933	1.227	1.566	0.528	35	3.58	3.25	0.171
T3	2	4	108	27	55	17	0.036	12.91	4.23	8.68	2.579	0.9	2.933	1.238	1.569	0.539	37	3.64	3.41	0.191
	2	4	109.5	27.6	55.4	17.4	0.038	13.01	4.36	8.78	2.709	0.91	3.023	1.241	1.575	0.545	39	3.69	3.42	0.196
	2	4	108.5	27.8	56	17.5	0.039	13.11	4.44	8.88	2.789	0.95	3.068	1.246	1.577	0.55	40	3.65	3.46	0.195
T4	3	4	109.5	28.2	58	17.8	0.041	13.14	4.77	8.91	3.119	1	3.093	1.28	1.582	0.577	42	3.71	3.51	0.201
	3	4	110	28	58.5	18	0.04	13.2	4.83	8.97	3.179	1.02	3.113	1.285	1.588	0.573	41	3.67	3.53	0.222
	3	4	111.4	28.5	59	18.2	0.043	13.22	4.91	8.99	3.259	1.05	3.136	1.291	1.587	0.57	44	3.69	3.56	0.213
T5	0	5	102	21	48	17	0.03	11.34	4.01	7.11	2.359	0.7	2.983	1.327	1.62	0.61	31	3.78	3.21	0.143
	0	5	104	23.6	48	16.5	0.032	11.4	4.03	7.17	2.379	0.74	3.003	1.335	1.627	0.613	30	3.76	3.25	0.151
	0	5	105	23.4	49.5	17.2	0.033	11.42	4.12	7.19	2.469	0.79	3.033	1.344	1.626	0.607	30	3.8	3.3	0.153
T6	1	5	113.5	28.7	60.4	18.7	0.045	13.56	5.34	9.33	3.689	1.15	3.233	1.446	1.653	0.633	47	3.82	3.66	0.221
	1	5	115.4	29	61	18.9	0.046	13.68	5.43	9.45	3.779	1.23	3.063	1.568	1.672	0.646	46	3.85	3.74	0.229
	1	5	114.7	29.7	61.6	19.1	0.048	13.84	5.66	9.61	4.009	1.19	3.153	1.624	1.663	0.647	49	3.89	3.7	0.235
T7	2	5	117.8	30.2	64	19.4	0.053	13.78	6.09	9.55	4.439	1.27	3.933	2.072	2.633	0.969	51	3.93	3.78	0.276
	2	5	119.6	31.2	64.5	19.7	0.054	13.91	6.12	9.68	4.469	1.35	4.043	2.022	2.677	0.983	53	3.96	3.86	0.281
	2	5	121.4	30.8	66	20	0.056	13.94	6.23	9.71	4.579	1.36	4.103	1.922	2.707	1.001	51	3.97	3.87	0.289
T8	3	5	124.3	31.6	65	20.1	0.057	13.99	6.89	9.76	5.239	1.49	4.373	3.742	2.865	2.401	54	4.05	4	0.333
	3	5	122.5	32	66	20.3	0.061	14.1	6.77	9.87	5.119	1.43	4.253	3.852	2.755	2.272	55	4.1	3.94	0.323
	3	5	125	31.8	67	20.4	0.064	14.12	6.71	9.89	5.059	1.57	4.244	3.782	2.835	2.225	57	4.14	4.08	0.343
T9	0	6	106.5	23	50	18	0.034	11.98	5.01	7.75	3.359	0.89	2.793	1.245	1.575	0.545	41	3.8	3.4	0.171
	0	6	105.4	24	49.6	17.3	0.036	11.95	5.14	7.72	3.489	1.02	2.853	1.28	1.579	0.547	43	3.712	3.53	0.176
	0	6	107	24.6	49.5	18.7	0.037	12	5.14	7.77	3.489	0.98	2.833	1.289	1.582	0.55	44	3.74	3.49	0.183
T10	1	6	125.6	32	68.8	20.8	0.065	14.23	7.12	10	5.469	1.81	4.483	2.182	2.095	1.101	60	4.16	4.32	0.412
	1	6	127.4	32.4	69.6	20.81	0.067	14.56	7.15	10.33	5.499	1.87	4.353	2.272	2.156	1.124	58	4.055	4.38	0.423
	1	6	126.8	32.6	70	20.98	0.069	14.44	7.18	10.21	5.529	1.95	4.263	2.322	2.226	1.145	63	4.2	4.46	0.435
T11	2	6	131.4	32.8	71.4	21.34	0.071	14.67	7.41	10.44	5.759	2.02	4.803	4.513	3.774	2.657	64	4.24	4.53	0.489
	2	6	133	34	71	21.34	0.074	14.72	7.56	10.49	5.909	2.17	4.903	4.592	3.868	2.446	66	4.26	4.68	0.501
	2	6	134.2	34.3	72.2	21.37	0.076	14.77	7.55	10.54	5.899	2.24	4.873	4.632	3.825	2.33	69	4.3	4.75	0.498
T12	3	6	139.3	34	74	21.37	0.078	15	8	10.77	6.349	2.28	5.043	2.592	3.314	2.292	71	4.36	4.79	0.51
	3	6	137	36	74.6	21.46	0.081	15.23	7.97	11	6.319	2.34	5.153	2.672	3.475	2.33	72	4.38	4.85	0.512
	3	6	138	36.5	75	21.54	0.083	15	7.91	10.77	6.259	2.44	5.003	2.712	3.394	2.282	74	4.42	4.95	0.512
T13	0	7	109.5	24.7	50	19	0.039	12.45	5.56	8.22	3.909	1.07	2.933	1.287	1.629	0.579	46	3.81	3.58	0.183
	0	7	110.4	25	51.5	19	0.04	12.54	5.61	8.31	3.959	1.02	3.013	1.29	1.641	0.572	44	3.84	3.53	0.189
	0	7	112.4	25	52	19.5	0.041	12.55	5.67	8.32	4.019	1.01	3.033	1.293	1.634	0.564	43	3.86	3.52	0.197
T14	1	7	141.23	41	77	22.1	0.087	16.45	7.98	12.22	6.329	3.04	6.043	4.412	3.994	2.812	77	4.58	5.55	0.546
	1	7	143	41	77.8	22.16	0.086	16.77	8.12	12.54	6.469	3.11	6.083	4.522	4.074	2.768	75	4.69	5.62	0.552
	1	7	145	43	79	22.34	0.084	17	8.19	12.77	6.539	3.08	6.133	4.492	4.144	2.701	77	4.65	5.59	0.559
T15	2	7	144	42.6	79.5	23.56	0.089	18.23	8.91	14	7.259	3.27	6.263	4.592	4.234	3.002	79	4.71	5.78	0.589
	2	7	145	44	79.8	23.76	0.087	18.43	9.01	14.2	7.359	3.3	6.313	4.642	4.274	2.968	81	4.7	5.81	0.589
	2	7	146.7	45	80	23.98	0.09	18.57	9.03	14.34	7.379	3.37	6.303	4.672	4.294	3.035	83	4.75	5.88	0.592
T16	3	7	148.7	47	82	24.78	0.096	19.01	9.17	14.78	7.519	3.4	6.433	4.772	4.514	3.124	85	4.83	5.91	0.601
	3	7	149.3	49	83.4	24.87	0.098	19.112	9.23	14.882	7.579	3.45	6.463	4.822	4.534	3.163	82	4.91	5.96	0.599
	3	7	150	49	85	24.62	0.097	19.22	9.17	14.99	7.519	3.49	6.473	4.962	4.574	3.162	87	4.97	6	0.604
		T1	102.667	22.6667	48.1	14.5333	0.0266667	10.53	3.81333	6.3	2.16233	0.61	2.757	1.20967	1.53633	0.505333	24.6667	3.38	3.12
		T2	105.633	25.2	51.7	16.5	0.0336667	12.4233	4.13	8.19333	2.479	0.713333	2.91533	1.22433	1.56367	0.524667	32.3333	3.57333	3.22333
		T3	108.667	27.4667	55.4667	17.3	0.0376667	13.01	4.34333	8.78	2.69233	0.92	3.008	1.24167	1.57367	0.544667	38.6667	3.66	3.43
		T4	110.3	28.2333	58.5	18	0.0413333	13.1867	4.83667	8.95667	3.18567	1.02333	3.114	1.28533	1.58567	0.573333	42.3333	3.69	3.53333
		T5	103.667	22.6667	48.5	16.9	0.0316667	11.3867	4.05333	7.15667	2.40233	0.743333	3.00633	1.33533	1.62433	0.61	30.3333	3.78	3.25333
		T6	114.533	29.1333	61	18.9	0.0463333	13.6933	5.47667	9.46333	3.82567	1.19	3.14967	1.546	1.66267	0.642	47.3333	3.85333	3.7
		T7	119.6	30.7333	64.8333	19.7	0.0543333	13.8767	6.14667	9.64667	4.49567	1.32667	4.02633	2.00533	2.67233	0.984333	51.6667	3.95333	3.83667
		T8	123.933	31.8	66	20.2667	0.0606667	14.07	6.79	9.84	5.139	1.49667	4.29	3.792	2.81833	2.29933	55.3333	4.09667	4.00667
		T9	106.3	23.8667	49.7	18	0.0356667	11.9767	5.09667	7.74667	3.44567	0.963333	2.82633	1.27133	1.57867	0.547333	42.6667	3.75067	3.47333
		T10	126.6	32.3333	69.4667	20.8633	0.067	14.41	7.15	10.18	5.499	1.87667	4.36633	2.25867	2.159	1.12333	60.3333	4.13833	4.38667
		T11	132.867	33.7	71.5333	21.35	0.0736667	14.72	7.50667	10.49	5.85567	2.14333	4.85967	4.579	3.82233	2.47767	66.3333	4.26667	4.65333
		T12	138.1	35.5	74.5333	21.4567	0.0806667	15.0767	7.96	10.8467	6.309	2.35333	5.06633	2.65867	3.39433	2.30133	72.3333	4.38667	4.86333
		T13	110.767	24.9	51.1667	19.1667	0.04	12.5133	5.61333	8.28333	3.96233	1.03333	2.993	1.29	1.63467	0.571667	44.3333	3.83667	3.54333
		T14	143.077	41.6667	77.9333	22.2	0.0856667	16.74	8.09667	12.51	6.44567	3.07667	6.08633	4.47533	4.07067	2.76033	76.3333	4.64	5.58667
		T15	145.233	43.8667	79.7667	23.7667	0.0886667	18.41	8.98333	14.18	7.33233	3.31333	6.293	4.63533	4.26733	3.00167	81	4.72	5.82333
		T16	149.333	48.3333	83.4667	24.7567	0.097	19.114	9.19	14.884	7.539	3.44667	6.45633	4.852	4.54067	3.14967	84.6667	4.90333	5.95667
		T1	1.52753	0.763763	0.793725	0.208167	0.00351188	0.168226	0.0351188	0.168226	0.0351188	0.04	0.0225167	0.00550757	0.0061101	0.00450925	2.08167	0.06	0.04
		T2	0.776745	0.72111	0.7	0.360555	0.00152753	0.0960902	0.0264575	0.0960902	0.0264575	0.0251661	0.015695	0.00305505	0.00208167	0.00351188	2.51661	0.0503322	0.0251661
		T3	0.763763	0.416333	0.503322	0.264575	0.00152753	0.1	0.105987	0.1	0.105987	0.0264575	0.0687386	0.00404145	0.00416333	0.00550757	1.52753	0.0264575	0.0264575
		T4	0.984886	0.251661	0.5	0.2	0.00152753	0.0416333	0.0702377	0.0416333	0.0702377	0.0251661	0.0215174	0.00550757	0.00321455	0.00351188	1.52753	0.02	0.0251661
		T5	1.52753	1.44684	0.866025	0.360555	0.00152753	0.0416333	0.0585947	0.0416333	0.0585947	0.0450925	0.0251661	0.0085049	0.00378594	0.003	0.57735	0.02	0.0450925
		T6	0.960902	0.51316	0.6	0.2	0.00152753	0.140475	0.165025	0.140475	0.165025	0.04	0.085049	0.0910165	0.00950438	0.00781025	1.52753	0.0351188	0.04
		T7	1.8	0.503322	1.04083	0.3	0.00152753	0.085049	0.0737111	0.085049	0.0737111	0.0493288	0.0862168	0.0763763	0.0372201	0.0160416	1.1547	0.0208167	0.0493288
		T8	1.2897	0.2	1	0.152753	0.00351188	0.07	0.0916515	0.07	0.0916515	0.0702377	0.0720208	0.0556776	0.0568624	0.0911281	1.52753	0.0450925	0.0702377
		T9	0.818535	0.80829	0.264575	0.7	0.00152753	0.0251661	0.0750555	0.0251661	0.0750555	0.0665833	0.0305505	0.0232451	0.00351188	0.00251661	1.52753	0.0449592	0.0665833
		T10	0.916515	0.305505	0.61101	0.10116	0.002	0.167033	0.03	0.167033	0.03	0.0702377	0.110604	0.070946	0.0655515	0.0220076	2.51661	0.0748888	0.0702377
		T11	1.40475	0.793725	0.61101	0.0173205	0.00251661	0.05	0.083865	0.05	0.083865	0.112398	0.051316	0.0605558	0.0470567	0.165784	2.51661	0.0305505	0.112398
		T12	1.15326	1.32288	0.503322	0.085049	0.00251661	0.132791	0.0458258	0.132791	0.0458258	0.080829	0.0776745	0.061101	0.0805005	0.0253246	1.52753	0.0305505	0.080829
		T13	1.48436	0.173205	1.04083	0.288675	0.001	0.0550757	0.0550757	0.0550757	0.0550757	0.0321455	0.052915	0.003	0.00602771	0.00750555	1.52753	0.0251661	0.0321455
		T14	1.88617	1.1547	1.00664	0.1249	0.00152753	0.276225	0.106927	0.276225	0.106927	0.0351188	0.0450925	0.0568624	0.0750555	0.0558957	1.1547	0.0556776	0.0351188
		T15	1.36504	1.20554	0.251661	0.210079	0.00152753	0.17088	0.064291	0.17088	0.064291	0.051316	0.0264575	0.0404145	0.0305505	0.0335012	2	0.0264575	0.051316
		T16	0.650641	1.1547	1.50111	0.126623	0.001	0.105014	0.034641	0.105014	0.034641	0.0450925	0.0208167	0.0984886	0.0305505	0.0222336	2.51661	0.0702377	0.0450925

## Sheet: Sheet3
	CFW	CDW	CMC	nosb/c	TFC	TPC	TSC	TTTC	t.flavanols	Tctc	PAL	SOD	POD	CAT	dpph	toco ug/g FW	antho mg/100 g FW
T1	102.667	22.6667	48.1	14.5333	0.0266667	10.53	3.81333	6.3	2.16233	0.61	2.757	1.20967	1.53633	0.505333	24.6667	3.38	3.12
T2	105.633	25.2	51.7	16.5	0.0336667	12.4233	4.13	8.19333	2.479	0.713333	2.91533	1.22433	1.56367	0.524667	32.3333	3.57333	3.22333
T3	108.667	27.4667	55.4667	17.3	0.0376667	13.01	4.34333	8.78	2.69233	0.92	3.008	1.24167	1.57367	0.544667	38.6667	3.66	3.43
T4	110.3	28.2333	58.5	18	0.0413333	13.1867	4.83667	8.95667	3.18567	1.02333	3.114	1.28533	1.58567	0.573333	42.3333	3.69	3.53333
T5	103.667	22.6667	48.5	16.9	0.0316667	11.3867	4.05333	7.15667	2.40233	0.743333	3.00633	1.33533	1.62433	0.61	30.3333	3.78	3.25333
T6	114.533	29.1333	61	18.9	0.0463333	13.6933	5.47667	9.46333	3.82567	1.19	3.14967	1.546	1.66267	0.642	47.3333	3.85333	3.7
T7	119.6	30.7333	64.8333	19.7	0.0543333	13.8767	6.14667	9.64667	4.49567	1.32667	4.02633	2.00533	2.67233	0.984333	51.6667	3.95333	3.83667
T8	123.933	31.8	66	20.2667	0.0606667	14.07	6.79	9.84	5.139	1.49667	4.29	3.792	2.81833	2.29933	55.3333	4.09667	4.00667
T9	106.3	23.8667	49.7	18	0.0356667	11.9767	5.09667	7.74667	3.44567	0.963333	2.82633	1.27133	1.57867	0.547333	42.6667	3.75067	3.47333
T10	126.6	32.3333	69.4667	20.8633	0.067	14.41	7.15	10.18	5.499	1.87667	4.36633	2.25867	2.159	1.12333	60.3333	4.13833	4.38667
T11	132.867	33.7	71.5333	21.35	0.0736667	14.72	7.50667	10.49	5.85567	2.14333	4.85967	4.579	3.82233	2.47767	66.3333	4.26667	4.65333
T12	138.1	35.5	74.5333	21.4567	0.0806667	15.0767	7.96	10.8467	6.309	2.35333	5.06633	2.65867	3.39433	2.30133	72.3333	4.38667	4.86333
T13	110.767	24.9	51.1667	19.1667	0.04	12.5133	5.61333	8.28333	3.96233	1.03333	2.993	1.29	1.63467	0.571667	44.3333	3.83667	3.54333
T14	143.077	41.6667	77.9333	22.2	0.0856667	16.74	8.09667	12.51	6.44567	3.07667	6.08633	4.47533	4.07067	2.76033	76.3333	4.64	5.58667
T15	145.233	43.8667	79.7667	23.7667	0.0886667	18.41	8.98333	14.18	7.33233	3.31333	6.293	4.63533	4.26733	3.00167	81	4.72	5.82333
T16	149.333	48.3333	83.4667	24.7567	0.097	19.114	9.19	14.884	7.539	3.44667	6.45633	4.852	4.54067	3.14967	84.6667	4.90333	5.95667
	46.6667	25.6667	35.3667	10.2233	0.0703333	8.584	5.37667	8.584	5.37667	2.83667	3.69933	3.64233	3.00433	2.64433	60	1.52333	2.83667
	0.454545	1.13235	0.735274	0.70344	2.6375	0.815195	1.40997	1.36254	2.48651	4.65027	1.3418	3.01102	1.95552	5.23285	2.43243	0.45069	0.909188
	45.4545	113.235	73.5274	70.344	263.75	81.5195	140.997	136.254	248.651	465.027	134.18	301.102	195.552	523.285	243.243	45.069	90.9188

## Sheet: Sheet1
	CFW		CDW		CMC		nosb/c			TFC		TPC		TSC			TTTC		t.flavanols		Tctc			PAL		SOD		POD		CAT			dpph		toco ug/g FW		antho mg/100 g FW
	Mean	± SD	Mean	± SD	Mean	± SD	Mean	± SD		Mean	± SD	Mean	± SD	Mean	± SD		Mean	± SD	Mean	± SD	Mean	± SD		Mean	± SD	Mean	± SD	Mean	± SD	Mean	± SD		Mean	± SD	Mean	± SD	Mean	± SD
T1	102.667	1.52753	22.6667	0.763763	48.1	0.793725	14.5333	0.208167	T1	0.0266667	0.00351188	10.53	0.168226	3.81333	0.0351188	T1	6.3	0.168226	2.16233	0.0351188	0.61	0.04	T1	2.757	0.0225167	1.20967	0.00550757	1.53633	0.0061101	0.505333	0.00450925	T1	24.6667	2.08167	3.38	0.06	3.12	0.04
T2	105.633	0.776745	25.2	0.72111	51.7	0.7	16.5	0.360555	T2	0.0336667	0.00152753	12.4233	0.0960902	4.13	0.0264575	T2	8.19333	0.0960902	2.479	0.0264575	0.713333	0.0251661	T2	2.91533	0.015695	1.22433	0.00305505	1.56367	0.00208167	0.524667	0.00351188	T2	32.3333	2.51661	3.57333	0.0503322	3.22333	0.0251661
T3	108.667	0.763763	27.4667	0.416333	55.4667	0.503322	17.3	0.264575	T3	0.0376667	0.00152753	13.01	0.1	4.34333	0.105987	T3	8.78	0.1	2.69233	0.105987	0.92	0.0264575	T3	3.008	0.0687386	1.24167	0.00404145	1.57367	0.00416333	0.544667	0.00550757	T3	38.6667	1.52753	3.66	0.0264575	3.43	0.0264575
T4	110.3	0.984886	28.2333	0.251661	58.5	0.5	18	0.2	T4	0.0413333	0.00152753	13.1867	0.0416333	4.83667	0.0702377	T4	8.95667	0.0416333	3.18567	0.0702377	1.02333	0.0251661	T4	3.114	0.0215174	1.28533	0.00550757	1.58567	0.00321455	0.573333	0.00351188	T4	42.3333	1.52753	3.69	0.02	3.53333	0.0251661
T5	103.667	1.52753	22.6667	1.44684	48.5	0.866025	16.9	0.360555	T5	0.0316667	0.00152753	11.3867	0.0416333	4.05333	0.0585947	T5	7.15667	0.0416333	2.40233	0.0585947	0.743333	0.0450925	T5	3.00633	0.0251661	1.33533	0.0085049	1.62433	0.00378594	0.61	0.003	T5	30.3333	0.57735	3.78	0.02	3.25333	0.0450925
T6	114.533	0.960902	29.1333	0.51316	61	0.6	18.9	0.2	T6	0.0463333	0.00152753	13.6933	0.140475	5.47667	0.165025	T6	9.46333	0.140475	3.82567	0.165025	1.19	0.04	T6	3.14967	0.085049	1.546	0.0910165	1.66267	0.00950438	0.642	0.00781025	T6	47.3333	1.52753	3.85333	0.0351188	3.7	0.04
T7	119.6	1.8	30.7333	0.503322	64.8333	1.04083	19.7	0.3	T7	0.0543333	0.00152753	13.8767	0.085049	6.14667	0.0737111	T7	9.64667	0.085049	4.49567	0.0737111	1.32667	0.0493288	T7	4.02633	0.0862168	2.00533	0.0763763	2.67233	0.0372201	0.984333	0.0160416	T7	51.6667	1.1547	3.95333	0.0208167	3.83667	0.0493288
T8	123.933	1.2897	31.8	0.2	66	1	20.2667	0.152753	T8	0.0606667	0.00351188	14.07	0.07	6.79	0.0916515	T8	9.84	0.07	5.139	0.0916515	1.49667	0.0702377	T8	4.29	0.0720208	3.792	0.0556776	2.81833	0.0568624	2.29933	0.0911281	T8	55.3333	1.52753	4.09667	0.0450925	4.00667	0.0702377
T9	106.3	0.818535	23.8667	0.80829	49.7	0.264575	18	0.7	T9	0.0356667	0.00152753	11.9767	0.0251661	5.09667	0.0750555	T9	7.74667	0.0251661	3.44567	0.0750555	0.963333	0.0665833	T9	2.82633	0.0305505	1.27133	0.0232451	1.57867	0.00351188	0.547333	0.00251661	T9	42.6667	1.52753	3.75067	0.0449592	3.47333	0.0665833
T10	126.6	0.916515	32.3333	0.305505	69.4667	0.61101	20.8633	0.10116	T10	0.067	0.002	14.41	0.167033	7.15	0.03	T10	10.18	0.167033	5.499	0.03	1.87667	0.0702377	T10	4.36633	0.110604	2.25867	0.070946	2.159	0.0655515	1.12333	0.0220076	T10	60.3333	2.51661	4.13833	0.0748888	4.38667	0.0702377
T11	132.867	1.40475	33.7	0.793725	71.5333	0.61101	21.35	0.0173205	T11	0.0736667	0.00251661	14.72	0.05	7.50667	0.083865	T11	10.49	0.05	5.85567	0.083865	2.14333	0.112398	T11	4.85967	0.051316	4.579	0.0605558	3.82233	0.0470567	2.47767	0.165784	T11	66.3333	2.51661	4.26667	0.0305505	4.65333	0.112398
T12	138.1	1.15326	35.5	1.32288	74.5333	0.503322	21.4567	0.085049	T12	0.0806667	0.00251661	15.0767	0.132791	7.96	0.0458258	T12	10.8467	0.132791	6.309	0.0458258	2.35333	0.080829	T12	5.06633	0.0776745	2.65867	0.061101	3.39433	0.0805005	2.30133	0.0253246	T12	72.3333	1.52753	4.38667	0.0305505	4.86333	0.080829
T13	110.767	1.48436	24.9	0.173205	51.1667	1.04083	19.1667	0.288675	T13	0.04	0.001	12.5133	0.0550757	5.61333	0.0550757	T13	8.28333	0.0550757	3.96233	0.0550757	1.03333	0.0321455	T13	2.993	0.052915	1.29	0.003	1.63467	0.00602771	0.571667	0.00750555	T13	44.3333	1.52753	3.83667	0.0251661	3.54333	0.0321455
T14	143.077	1.88617	41.6667	1.1547	77.9333	1.00664	22.2	0.1249	T14	0.0856667	0.00152753	16.74	0.276225	8.09667	0.106927	T14	12.51	0.276225	6.44567	0.106927	3.07667	0.0351188	T14	6.08633	0.0450925	4.47533	0.0568624	4.07067	0.0750555	2.76033	0.0558957	T14	76.3333	1.1547	4.64	0.0556776	5.58667	0.0351188
T15	145.233	1.36504	43.8667	1.20554	79.7667	0.251661	23.7667	0.210079	T15	0.0886667	0.00152753	18.41	0.17088	8.98333	0.064291	T15	14.18	0.17088	7.33233	0.064291	3.31333	0.051316	T15	6.293	0.0264575	4.63533	0.0404145	4.26733	0.0305505	3.00167	0.0335012	T15	81	2	4.72	0.0264575	5.82333	0.051316
T16	149.333	0.650641	48.3333	1.1547	83.4667	1.50111	24.7567	0.126623	T16	0.097	0.001	19.114	0.105014	9.19	0.034641	T16	14.884	0.105014	7.539	0.034641	3.44667	0.0450925	T16	6.45633	0.0208167	4.852	0.0984886	4.54067	0.0305505	3.14967	0.0222336	T16	84.6667	2.51661	4.90333	0.0702377	5.95667	0.0450925
T1
T2
T3
T4
T5
T6
T7
T8
T9
T10
T11
T12
T13
T14
T15
T16

## Sheet: Sheet5
	dpph
	Mean	± SD
T1	24.67	2.08
T2	32.33	2.52
T3	38.67	1.53
T4	42.33	1.53
T5	30.33	0.58
T6	47.33	1.53
T7	51.67	1.15
T8	55.33	1.53
T9	42.67	1.53
T10	60.33	2.52
T11	66.33	2.52
T12	72.33	1.53
T13	44.33	1.53
T14	76.33	1.15
T15	81	2
T16	84.67	2.52

## Sheet: PCA_HID
	-5.63441	0.423572	0.626941	-0.45834	0.176428	-0.244741	0.265608	0.141998	-0.479247	-0.189472	0.0513326	0.0730502	0.221973	-0.135415	0.281933	6.51118	-4.05877	-2.44503	3.62571	-2.41079	-8.51102	3.30494	-7.36289	1.14301	-2.44026	-0.303543	15.1161	-6.21271	-10.5478	11.8228
	-5.44445	0.256676	0.640618	-0.472683	0.188769	-0.429744	0.241532	0.107403	-0.368673	-0.206985	0.12266	0.127485	0.172433	-0.0600697	0.238153	6.4088	-8.4199	5.43499	-3.73224	-7.8457	2.48912	5.78989	3.58368	-3.27715	12.5911	15.8706	-4.53458	-0.797698	-5.9117	0.0813469
	-5.18495	0.23731	0.56258	-0.457632	0.120735	-0.178424	0.242207	0.00433967	-0.404563	-0.0849638	0.133661	0.205772	0.270176	-0.0780411	0.283312	6.41457	-8.68947	4.72809	2.97594	-5.88326	7.76024	2.2864	0.461392	-4.21828	-5.41787	-6.15206	-4.79117	-3.88407	14.0585	13.3432
	-4.27647	-0.236394	0.562928	-0.144774	-0.0768125	-0.0763217	0.162057	0.00643644	-0.0435163	-0.073051	0.0647046	0.00763761	-0.0385422	-0.102714	-0.235076	6.47585	2.73372	-7.54723	7.50125	0.393489	-6.42997	-6.7669	-3.96247	12.2893	2.97116	5.88359	-11.2053	-11.7934	4.69434	0.279805
	-4.16629	-0.111377	0.438172	-0.0395429	-0.011811	0.0342424	0.0650924	-0.125056	0.0249729	-0.0986112	-0.0262307	0.0923592	0.00317764	-0.101792	-0.3132	6.52461	-3.44567	-1.33242	-1.50021	2.27546	-3.36981	-3.44667	-5.42553	4.94859	4.65927	6.67226	11.3546	13.2472	15.1631	-2.34268
	-3.98511	-0.209417	0.368709	-0.0840033	-0.0300895	-0.00889787	0.018325	-0.125868	0.13939	-0.0131059	-0.0786187	0.0278041	-0.0884192	-0.0471472	-0.21769	6.46344	-7.3412	3.82778	1.82982	-2.45508	1.73182	0.457912	0.195971	3.97409	-3.07284	-5.76494	2.64011	-3.73293	-1.54309	-12.9896
	-3.5513	-0.43394	0.370761	-0.156649	-0.104327	0.16954	0.0570345	-0.194378	0.0715671	-0.0336516	-0.0215787	-0.0150467	-0.157366	-0.0837	-0.238469	6.45907	1.37589	-10.2864	3.34268	-1.58431	-3.51395	3.04813	12.427	-4.71303	-1.6822	-0.604638	0.98899	2.27895	0.93897	-1.33918
	-3.3033	-0.458709	0.279569	-0.057075	-0.110681	0.185018	0.0173349	-0.210146	0.117975	0.0561309	0.00641587	-0.00237953	-0.165466	-0.0974016	-0.216791	6.46344	-7.3412	3.82778	1.82982	-2.45508	1.73182	0.457912	0.195971	3.97409	-3.07284	-5.76494	2.64011	-3.73293	-1.54309	-12.9896
	-3.21723	-0.522391	0.2663	-0.124632	-0.0865914	0.159279	-0.0010999	-0.13705	0.125163	0.0900203	-0.0305452	-0.0475945	-0.182002	-0.0174498	-0.253855	6.50093	-5.38946	0.669542	-0.769573	1.20761	-2.73587	-3.11979	-2.44961	4.88342	-12.478	1.76007	-11.2742	15.4241	-9.41123	3.68837
	-2.89444	-0.52777	0.0899509	-0.0456853	-0.131794	0.22502	-0.00280306	-0.0554085	0.0810875	0.0937544	-0.0257359	-0.0504123	-0.1728	0.0643869	-0.169481	6.45907	1.37589	-10.2864	3.34268	-1.58431	-3.51395	3.04813	12.427	-4.71303	-1.6822	-0.604638	0.98899	2.27895	0.93897	-1.33918
	-2.83705	-0.591713	0.0820368	-0.0406398	-0.119732	0.116419	-0.0128981	-0.0284576	0.107308	-0.0221088	-0.0395428	-0.139662	-0.194966	0.0486553	-0.146399	6.51744	0.0330952	-3.94069	-11.0191	7.51322	1.25234	-1.00923	-4.57584	-7.41834	-4.11973	2.55255	-1.02997	-5.44813	0.833809	-2.01748
	-2.65706	-0.620436	-0.0177503	-0.05701	-0.132645	0.144706	-0.0413266	-0.0535826	0.140988	0.117324	-0.0427243	-0.0605769	-0.202366	0.0917569	-0.0939914	6.41172	-1.33558	10.9618	9.45239	15.1231	-5.3521	-7.51126	3.75475	-8.25544	8.35462	-4.18841	-1.5345	0.714114	-2.2089	1.82902
	-4.54248	0.682448	0.226216	0.161017	0.266134	0.111531	-0.133964	-0.268663	-0.0361861	-0.103599	0.0337385	-0.069087	-0.0035748	-0.0483662	-0.108712	6.25937	11.7638	8.29898	-5.60883	-14.7657	-5.58812	-13.6963	1.48903	-4.66597	-2.02482	-1.07656	1.63314	-0.235632	0.0912723	-0.374968
	-4.4207	0.49257	0.348934	0.0436571	0.188733	0.0848317	-0.00716043	-0.241358	-0.161787	-0.0240738	0.230494	0.0376845	0.074484	-0.154993	-0.0927896	6.37385	9.89325	4.08303	-0.511047	-1.45648	-8.28998	17.7046	-8.58122	-1.15855	4.15062	-6.96396	-6.39661	3.49398	2.66368	-2.4901
	-4.22404	0.500249	0.23121	0.161535	0.196381	0.0732009	-0.0727956	-0.306775	-0.121319	-0.0567129	0.268289	-0.0319527	-0.0457329	-0.0510409	-0.0305996	6.31948	9.87851	9.38063	-3.79216	7.57881	6.26835	5.65136	10.6449	12.6447	-5.42774	5.06743	4.89295	-2.81543	0.0877061	4.25151
	-2.09313	-0.54882	-0.222123	0.0940556	-0.181639	0.238814	-0.0797548	-0.0124344	0.102335	0.096659	-0.094529	-0.0133503	-0.245155	0.0936501	-0.145354	6.48636	0.341249	-7.23491	-8.73703	-0.315774	8.41269	-4.31091	0.677208	7.2126	13.6762	-13.4559	-0.744699	3.35341	-5.24392	5.16262
	-1.91335	-0.547921	-0.301213	0.0624738	-0.296209	0.224001	-0.0613385	-0.0817205	0.0978591	-0.0328697	-0.00863769	0.0319072	-0.30697	0.101996	-0.157643	6.37218	9.39513	-3.4315	12.9671	-1.31243	16.593	-0.870755	-8.5974	-5.3295	-0.81252	4.54303	2.191	3.23976	-3.88304	-2.5027
	-1.68253	-0.5763	-0.377703	0.148156	-0.359899	0.28842	-0.114981	0.0368721	0.129461	0.0891234	-0.0445717	0.00383343	-0.223613	0.123162	-0.198628	6.51744	0.0330952	-3.94069	-11.0191	7.51322	1.25234	-1.00923	-4.57584	-7.41834	-4.11973	2.55255	-1.02997	-5.44813	0.833809	-2.01748
	-0.742124	-0.141011	-0.0585689	0.280579	-0.185334	-0.135262	0.19905	0.0288236	-0.0233566	0.234869	-0.255121	-0.142382	0.0300936	0.227445	0.00960119
	-0.485415	-0.216086	-0.0930109	0.284471	-0.137478	-0.11327	0.210842	-0.0410831	-0.0131771	0.328113	-0.222217	-0.153522	-0.0351204	0.175797	0.033434
	-0.354762	-0.277774	-0.139088	0.428456	-0.0849953	-0.192002	0.254279	-0.0704825	0.000930285	0.223427	-0.190627	-0.13097	-0.0610652	0.281846	0.107716
	0.816762	0.82922	0.43308	0.0603854	-0.279826	-0.25175	-0.0314045	0.69459	0.243205	-0.138077	0.013145	0.17681	-0.0271332	0.0626851	0.314364
	0.810403	0.762535	0.419768	0.110488	-0.456789	-0.110739	-0.18767	0.590332	0.29851	-0.0370953	0.0580791	0.184505	0.0250285	0.229266	0.236333
	1.03317	0.697003	0.32195	0.0373154	-0.379185	-0.0829272	-0.180968	0.348796	0.286789	-0.0773886	0.0328741	0.217934	0.0640575	0.235868	0.324325
	-3.6285	0.359973	-0.496304	0.0990387	0.0754583	0.110677	-0.098822	0.00783138	0.0826372	-0.000871259	-0.0633029	-0.0605167	-0.0729315	-0.107328	-0.15425
	-3.56367	0.252883	-0.476772	-0.228814	0.148098	0.0689412	-0.0591692	0.157123	-0.0815818	0.0722275	-0.0788895	-0.0120876	0.0682301	-0.112532	-0.180793
	-3.36016	0.271292	-0.624886	-0.0425915	0.0882241	-0.0343648	-0.174304	0.0450358	0.20259	0.175578	0.0635099	-0.168573	-0.112172	-0.096829	-0.143874
	0.90481	-0.568027	-0.725817	0.372359	0.143468	0.0616499	-0.393779	0.135105	-0.115112	-0.0397937	0.00771385	-0.119692	0.214586	0.103346	0.306053
	1.03165	-0.747663	-0.653919	0.219897	0.0471445	-0.136566	-0.316468	0.139383	-0.0502612	-0.187295	0.0160692	-0.0601643	0.152535	0.169161	0.235916
	1.27088	-0.580787	-0.828176	0.190083	0.0267599	0.133952	-0.359071	-0.013021	-0.0418664	-0.0959335	0.0192383	-0.111453	0.272635	0.155254	0.287363
	2.8196	0.963834	0.386752	-0.134548	-0.268946	-0.42103	-0.0377668	0.199244	0.266773	-0.358408	-0.176971	-0.0885107	0.360831	0.151585	0.506472
	3.09056	0.869409	0.24703	-0.232406	-0.280558	-0.515269	-0.0675165	0.0763642	0.0690597	-0.232854	-0.144388	-0.0857864	0.440427	0.0963169	0.460241
	3.23218	0.785524	0.144857	-0.282746	-0.340665	-0.415001	-0.145414	-0.0450528	0.0127586	-0.15636	-0.19193	-0.035349	0.435767	0.123393	0.509434
	3.20755	-0.114753	-0.562355	0.205668	0.454882	-0.0231855	0.291919	0.0922979	0.163315	-0.184665	-0.155307	0.184938	0.412984	0.0170925	0.675581
	3.46019	-0.158764	-0.414165	0.128413	0.428641	0.0402381	0.344051	0.0695032	0.139791	-0.01452	-0.0642865	0.0730778	0.461639	0.10118	0.528691
	3.51419	-0.150219	-0.553296	-0.00310325	0.39042	0.14347	0.270818	-0.0661119	0.105492	0.0291695	0.046218	0.10795	0.46593	0.11771	0.652201
	-2.90843	0.228107	-0.822073	0.0794398	0.10071	-0.0249242	-0.143827	0.119721	0.174217	0.158355	-0.0140079	-0.0496527	-0.174865	-0.116658	-0.272248
	-2.82302	0.157063	-0.747966	0.238539	0.0503068	-0.0279881	-0.112923	0.121972	0.131407	0.105774	0.0170435	-0.0280621	-0.151554	-0.0671043	-0.240156
	-2.70391	0.139369	-0.814491	0.371704	0.0315066	-0.111489	-0.146591	0.0678401	0.194146	0.0661437	0.0875093	-0.0338186	-0.211133	-0.0507304	-0.179174
	5.35472	0.202565	0.338857	-0.349463	0.323475	0.0472341	-0.0773467	-0.198959	-0.2619	0.0805656	0.0753735	0.0911947	0.155019	-0.058487	0.209868
	5.60705	0.22765	0.323088	-0.184948	0.251986	0.0997738	-0.0448251	-0.291289	-0.412998	-0.0681283	0.0690376	0.128021	0.0844276	-0.116414	0.093428
	5.7883	0.0106245	0.354767	-0.175162	0.111041	0.042923	0.0536018	-0.245857	-0.395547	0.0725124	0.0408311	0.0384088	-0.00518258	-0.238511	0.13621
	6.70923	-0.0270672	0.134273	-0.0470638	0.213009	0.0259071	0.00141696	0.0212826	-0.124305	-0.152328	-0.0551474	-0.00547334	-0.130008	-0.0986708	-0.387761
	6.89334	-0.11683	0.119513	-0.0722186	0.128242	0.00886453	0.0285634	0.0711673	-0.143924	-0.0431631	-0.0733558	-0.0743905	-0.236922	-0.208635	-0.414963
	7.15702	-0.141416	0.0820637	-0.105673	0.113828	0.077691	0.0271429	-0.00836392	-0.0854894	0.0281869	0.0117347	-0.00193149	-0.25093	-0.224937	-0.419239
	7.76004	-0.210652	0.112564	0.0370607	0.0133052	0.0808962	0.0833659	-0.108561	0.0471382	0.184828	0.105186	-0.0194121	-0.278968	-0.111525	-0.480907
	7.98087	-0.265805	0.196555	0.131248	-0.0710611	0.165559	0.157456	-0.137965	-0.0770053	0.185423	0.360775	-0.00528549	-0.318044	-0.0564395	-0.509837
	8.15576	-0.247838	0.219631	0.0513636	-0.150618	0.371096	0.114289	-0.215818	-0.115047	0.237903	0.162631	0.00672294	-0.293433	-0.128622	-0.428747

## Sheet: Correlation tests_HID
	CFW	CDW	CMC	nosb/c	TFC	TPC	TSC	TTTC	TiAC	t.flavanols	Tctc	PAL	SOD	POD	CAT	dpph	toco ug/g FW	antho mg/100 g FW
CFW	1	0.981455	0.983331	0.98219	0.995384	0.989956	0.982056	0.989956	0.993647	0.982056	0.987349	0.967286	0.923012	0.948204	0.932213	0.983028	0.950729	0.987349
CDW	0.981455	1	0.994435	0.943909	0.982868	0.994652	0.945027	0.994652	0.987946	0.945027	0.966173	0.969919	0.903847	0.920732	0.917879	0.957829	0.910606	0.966173
CMC	0.983331	0.994435	1	0.946794	0.983223	0.997096	0.94764	0.997096	0.990092	0.94764	0.965906	0.971606	0.900114	0.918354	0.915447	0.95797	0.915857	0.965906
nosb/c	0.98219	0.943909	0.946794	1	0.981973	0.958633	0.992834	0.958633	0.972447	0.992834	0.985097	0.94796	0.941341	0.963735	0.94533	0.987836	0.978692	0.985097
TFC	0.995384	0.982868	0.983223	0.981973	1	0.990038	0.980319	0.990038	0.994815	0.980319	0.99115	0.9722	0.929964	0.9513	0.941499	0.986667	0.952848	0.99115
TPC	0.989956	0.994652	0.997096	0.958633	0.990038	1	0.957551	1	0.994952	0.957551	0.974649	0.977146	0.911711	0.930601	0.927369	0.967476	0.926476	0.974649
TSC	0.982056	0.945027	0.94764	0.992834	0.980319	0.957551	1	0.957551	0.971391	1	0.986591	0.937161	0.927259	0.953695	0.932387	0.990144	0.971012	0.986591
TTTC	0.989956	0.994652	0.997096	0.958633	0.990038	1	0.957551	1	0.994952	0.957551	0.974649	0.977146	0.911711	0.930601	0.927369	0.967476	0.926476	0.974649
TiAC	0.993647	0.987946	0.990092	0.972447	0.994815	0.994952	0.971391	0.994952	1	0.971391	0.985396	0.974131	0.920987	0.941154	0.934529	0.978198	0.940204	0.985396
t.flavanols	0.982056	0.945027	0.94764	0.992834	0.980319	0.957551	1	0.957551	0.971391	1	0.986591	0.937161	0.927259	0.953695	0.932387	0.990144	0.971012	0.986591
Tctc	0.987349	0.966173	0.965906	0.985097	0.99115	0.974649	0.986591	0.974649	0.985396	0.986591	1	0.960964	0.940963	0.962352	0.951574	0.992995	0.964632	1
PAL	0.967286	0.969919	0.971606	0.94796	0.9722	0.977146	0.937161	0.977146	0.974131	0.937161	0.960964	1	0.942211	0.953666	0.960858	0.945126	0.93871	0.960964
SOD	0.923012	0.903847	0.900114	0.941341	0.929964	0.911711	0.927259	0.911711	0.920987	0.927259	0.940963	0.942211	1	0.983959	0.984068	0.933538	0.96477	0.940963
POD	0.948204	0.920732	0.918354	0.963735	0.9513	0.930601	0.953695	0.930601	0.941154	0.953695	0.962352	0.953666	0.983959	1	0.986755	0.954552	0.979101	0.962352
CAT	0.932213	0.917879	0.915447	0.94533	0.941499	0.927369	0.932387	0.927369	0.934529	0.932387	0.951574	0.960858	0.984068	0.986755	1	0.940785	0.967077	0.951574
dpph	0.983028	0.957829	0.95797	0.987836	0.986667	0.967476	0.990144	0.967476	0.978198	0.990144	0.992995	0.945126	0.933538	0.954552	0.940785	1	0.966117	0.992995
toco ug/g FW	0.950729	0.910606	0.915857	0.978692	0.952848	0.926476	0.971012	0.926476	0.940204	0.971012	0.964632	0.93871	0.96477	0.979101	0.967077	0.966117	1	0.964632
antho mg/100 g FW	0.987349	0.966173	0.965906	0.985097	0.99115	0.974649	0.986591	0.974649	0.985396	0.986591	1	0.960964	0.940963	0.962352	0.951574	0.992995	0.964632	1

## Sheet: Heat maps_HID
6.21094	607.981
1.5	607.981
1.5	16.9836
1	16.9836
1	0
1	16.9836
2	16.9836
2	0
2	16.9836
1.5	16.9836
1.5	607.981
10.9219	607.981
10.9219	102.429
6.96875	102.429
6.96875	3.89731
3.9375	3.89731
3.9375	0.420456
3	0.420456
3	0
3	0.420456
4.875	0.420456
4.875	0.0933266
4	0.0933266
4	0
4	0.0933266
5.75	0.0933266
5.75	0.0366356
5	0.0366356
5	0
5	0.0366356
6.5	0.0366356
6.5	0.0131329
6	0.0131329
6	0
6	0.0131329
7	0.0131329
7	0
7	0.0131329
6.5	0.0131329
6.5	0.0366356
5.75	0.0366356
5.75	0.0933266
4.875	0.0933266
4.875	0.420456
3.9375	0.420456
3.9375	3.89731
10	3.89731
10	0.578625
8.5	0.578625
8.5	0.00471339
8	0.00471339
8	0
8	0.00471339
9	0.00471339
9	0
9	0.00471339
8.5	0.00471339
8.5	0.578625
11.5	0.578625
11.5	0.138035
10.5	0.138035
10.5	0.0126189
10	0.0126189
10	0
10	0.0126189
11	0.0126189
11	0
11	0.0126189
10.5	0.0126189
10.5	0.138035
12.5	0.138035
12.5	0.0150033
12	0.0150033
12	0
12	0.0150033
13	0.0150033
13	0
13	0.0150033
12.5	0.0150033
12.5	0.138035
11.5	0.138035
11.5	0.578625
10	0.578625
10	3.89731
6.96875	3.89731
6.96875	102.429
14.875	102.429
14.875	28.1215
14	28.1215
14	0
14	28.1215
15.75	28.1215
15.75	5.8762
15	5.8762
15	0
15	5.8762
16.5	5.8762
16.5	1.39808
16	1.39808
16	0
16	1.39808
17	1.39808
17	0
17	1.39808
16.5	1.39808
16.5	5.8762
15.75	5.8762
15.75	28.1215
14.875	28.1215
14.875	102.429
10.9219	102.429
10.9219	607.981
6.21094	607.981
				17.7852	6.0311
				5.96875	6.0311
				5.96875	0.574699
				2.5	0.574699
				2.5	0.0610933
				1.5	0.0610933
				1.5	0.00503855
				1	0.00503855
				1	0
				1	0.00503855
				2	0.00503855
				2	0
				2	0.00503855
				1.5	0.00503855
				1.5	0.0610933
				3.5	0.0610933
				3.5	0.0112404
				3	0.0112404
				3	0
				3	0.0112404
				4	0.0112404
				4	0
				4	0.0112404
				3.5	0.0112404
				3.5	0.0610933
				2.5	0.0610933
				2.5	0.574699
				9.4375	0.574699
				9.4375	0.162426
				7	0.162426
				7	0.0229765
				5.5	0.0229765
				5.5	0.00259269
				5	0.00259269
				5	0
				5	0.00259269
				6	0.00259269
				6	0
				6	0.00259269
				5.5	0.00259269
				5.5	0.0229765
				8.5	0.0229765
				8.5	0.00430911
				7.5	0.00430911
				7.5	0.000600392
				7	0.000600392
				7	0
				7	0.000600392
				8	0.000600392
				8	0
				8	0.000600392
				7.5	0.000600392
				7.5	0.00430911
				9.5	0.00430911
				9.5	0.00239662
				9	0.00239662
				9	0
				9	0.00239662
				10	0.00239662
				10	0
				10	0.00239662
				9.5	0.00239662
				9.5	0.00430911
				8.5	0.00430911
				8.5	0.0229765
				7	0.0229765
				7	0.162426
				11.875	0.162426
				11.875	0.0296905
				11	0.0296905
				11	0
				11	0.0296905
				12.75	0.0296905
				12.75	0.00947036
				12	0.00947036
				12	0
				12	0.00947036
				13.5	0.00947036
				13.5	0.00346711
				13	0.00346711
				13	0
				13	0.00346711
				14	0.00346711
				14	0
				14	0.00346711
				13.5	0.00346711
				13.5	0.00947036
				12.75	0.00947036
				12.75	0.0296905
				11.875	0.0296905
				11.875	0.162426
				9.4375	0.162426
				9.4375	0.574699
				5.96875	0.574699
				5.96875	6.0311
				29.6016	6.0311
				29.6016	1.5584
				22.5	1.5584
				22.5	0.21229
				18.75	0.21229
				18.75	0.0263771
				16.625	0.0263771
				16.625	0.00836767
				15.5	0.00836767
				15.5	0.00138327
				15	0.00138327
				15	0
				15	0.00138327
				16	0.00138327
				16	0
				16	0.00138327
				15.5	0.00138327
				15.5	0.00836767
				17.75	0.00836767
				17.75	0.00390765
				17	0.00390765
				17	0
				17	0.00390765
				18.5	0.00390765
				18.5	0.00155381
				18	0.00155381
				18	0
				18	0.00155381
				19	0.00155381
				19	0
				19	0.00155381
				18.5	0.00155381
				18.5	0.00390765
				17.75	0.00390765
				17.75	0.00836767
				16.625	0.00836767
				16.625	0.0263771
				20.875	0.0263771
				20.875	0.0145553
				20	0.0145553
				20	0
				20	0.0145553
				21.75	0.0145553
				21.75	0.00222592
				21	0.00222592
				21	0
				21	0.00222592
				22.5	0.00222592
				22.5	0.000540327
				22	0.000540327
				22	0
				22	0.000540327
				23	0.000540327
				23	0
				23	0.000540327
				22.5	0.000540327
				22.5	0.00222592
				21.75	0.00222592
				21.75	0.0145553
				20.875	0.0145553
				20.875	0.0263771
				18.75	0.0263771
				18.75	0.21229
				26.25	0.21229
				26.25	0.0308035
				24.75	0.0308035
				24.75	0.00408123
				24	0.00408123
				24	0
				24	0.00408123
				25.5	0.00408123
				25.5	0.00153142
				25	0.00153142
				25	0
				25	0.00153142
				26	0.00153142
				26	0
				26	0.00153142
				25.5	0.00153142
				25.5	0.00408123
				24.75	0.00408123
				24.75	0.0308035
				27.75	0.0308035
				27.75	0.0093217
				27	0.0093217
				27	0
				27	0.0093217
				28.5	0.0093217
				28.5	0.00263174
				28	0.00263174
				28	0
				28	0.00263174
				29	0.00263174
				29	0
				29	0.00263174
				28.5	0.00263174
				28.5	0.0093217
				27.75	0.0093217
				27.75	0.0308035
				26.25	0.0308035
				26.25	0.21229
				22.5	0.21229
				22.5	1.5584
				36.7031	1.5584
				36.7031	0.226826
				32.25	0.226826
				32.25	0.0338167
				30.75	0.0338167
				30.75	0.00500896
				30	0.00500896
				30	0
				30	0.00500896
				31.5	0.00500896
				31.5	0.00307652
				31	0.00307652
				31	0
				31	0.00307652
				32	0.00307652
				32	0
				32	0.00307652
				31.5	0.00307652
				31.5	0.00500896
				30.75	0.00500896
				30.75	0.0338167
				33.75	0.0338167
				33.75	0.00911404
				33	0.00911404
				33	0
				33	0.00911404
				34.5	0.00911404
				34.5	0.0038686
				34	0.0038686
				34	0
				34	0.0038686
				35	0.0038686
				35	0
				35	0.0038686
				34.5	0.0038686
				34.5	0.00911404
				33.75	0.00911404
				33.75	0.0338167
				32.25	0.0338167
				32.25	0.226826
				41.1562	0.226826
				41.1562	0.176627
				38	0.176627
				38	0.019724
				36.5	0.019724
				36.5	0.0012761
				36	0.0012761
				36	0
				36	0.0012761
				37	0.0012761
				37	0
				37	0.0012761
				36.5	0.0012761
				36.5	0.019724
				39.5	0.019724
				39.5	0.0074203
				38.5	0.0074203
				38.5	0.00135954
				38	0.00135954
				38	0
				38	0.00135954
				39	0.00135954
				39	0
				39	0.00135954
				38.5	0.00135954
				38.5	0.0074203
				40.5	0.0074203
				40.5	0.00229277
				40	0.00229277
				40	0
				40	0.00229277
				41	0.00229277
				41	0
				41	0.00229277
				40.5	0.00229277
				40.5	0.0074203
				39.5	0.0074203
				39.5	0.019724
				38	0.019724
				38	0.176627
				44.3125	0.176627
				44.3125	0.0409852
				42.5	0.0409852
				42.5	0.00292027
				42	0.00292027
				42	0
				42	0.00292027
				43	0.00292027
				43	0
				43	0.00292027
				42.5	0.00292027
				42.5	0.0409852
				46.125	0.0409852
				46.125	0.0118754
				44.75	0.0118754
				44.75	0.00346735
				44	0.00346735
				44	0
				44	0.00346735
				45.5	0.00346735
				45.5	0.000168611
				45	0.000168611
				45	0
				45	0.000168611
				46	0.000168611
				46	0
				46	0.000168611
				45.5	0.000168611
				45.5	0.00346735
				44.75	0.00346735
				44.75	0.0118754
				47.5	0.0118754
				47.5	0.00500466
				47	0.00500466
				47	0
				47	0.00500466
				48	0.00500466
				48	0
				48	0.00500466
				47.5	0.00500466
				47.5	0.0118754
				46.125	0.0118754
				46.125	0.0409852
				44.3125	0.0409852
				44.3125	0.176627
				41.1562	0.176627
				41.1562	0.226826
				36.7031	0.226826
				36.7031	1.5584
				29.6016	1.5584
				29.6016	6.0311
				17.7852	6.0311

## Sheet: Heat maps_HID1
	CMC	dpph	TSC	t.flavanols	toco ug/g FW	PAL	antho mg/100 g FW	TFC	TiAC	Tctc	CAT	SOD	POD	CDW	nosb/c	TPC	TTTC
101	1	1	1	1	1	1	1	1	1	1	1	1	1	1	1	1	1
103	1	1	1	1	1	1	1	1	1	1	1	1	1	1	1	1	1
104	1	1	1	1	1	1	1	1	1	1	1	1	1	1	1	1	1
105	1	1	1	1	1	1	1	1	1	1	1	1	1	1	1	1	1
106.5	1	1	1	1	1	1	1	1	1	1	1	1	1	1	1	1	1
108	1	1	1	1	1	1	1	1	1	1	1	1	1	1	1	1	1
109.5	1	1	1	1	1	1	1	1	1	1	1	1	1	1	1	1	1
108.5	1	1	1	1	1	1	1	1	1	1	1	1	1	1	1	1	1
109.5	1	1	1	1	1	1	1	1	1	1	1	1	1	1	1	1	1
110	1	1	1	1	1	1	1	1	1	1	1	1	1	1	1	1	1
102	1	1	1	1	1	1	1	1	1	1	1	1	1	1	1	1	1
105.4	1	1	1	1	1	1	1	1	1	1	1	1	1	1	1	1	1
104	1	1	1	1	1	1	1	1	1	1	1	1	1	1	1	1	1
105	1	1	1	1	1	1	1	1	1	1	1	1	1	1	1	1	1
143	1	1	1	1	1	1	1	1	1	1	1	1	1	1	1	1	1
145	1	1	1	1	1	1	1	1	1	1	1	1	1	1	1	1	1
141.23	1	1	1	1	1	1	1	1	1	1	1	1	1	1	1	1	1
144	1	1	1	1	1	1	1	1	1	1	1	1	1	1	1	1	1
145	1	1	1	1	1	1	1	1	1	1	1	1	1	1	1	1	1
149.3	1	1	1	1	1	1	1	1	1	1	1	1	1	1	1	1	1
150	1	1	1	1	1	1	1	1	1	1	1	1	1	1	1	1	1
146.7	1	1	1	1	1	1	1	1	1	1	1	1	1	1	1	1	1
148.7	1	1	1	1	1	1	1	1	1	1	1	1	1	1	1	1	1
139.3	1	1	1	1	1	1	1	1	1	1	1	1	1	1	1	1	1
137	1	1	1	1	1	1	1	1	1	1	1	1	1	1	1	1	1
138	1	1	1	1	1	1	1	1	1	1	1	1	1	1	1	1	1
131.4	1	1	1	1	1	1	1	1	1	1	1	1	1	1	1	1	1
133	1	1	1	1	1	1	1	1	1	1	1	1	1	1	1	1	1
134.2	1	1	1	1	1	1	1	1	1	1	1	1	1	1	1	1	1
106.5	1	1	1	1	1	1	1	1	1	1	1	1	1	1	1	1	1
110.4	1	1	1	1	1	1	1	1	1	1	1	1	1	1	1	1	1
112.4	1	1	1	1	1	1	1	1	1	1	1	1	1	1	1	1	1
105.4	1	1	1	1	1	1	1	1	1	1	1	1	1	1	1	1	1
107	1	1	1	1	1	1	1	1	1	1	1	1	1	1	1	1	1
109.5	1	1	1	1	1	1	1	1	1	1	1	1	1	1	1	1	1
111.4	1	1	1	1	1	1	1	1	1	1	1	1	1	1	1	1	1
115.4	1	1	1	1	1	1	1	1	1	1	1	1	1	1	1	1	1
113.5	1	1	1	1	1	1	1	1	1	1	1	1	1	1	1	1	1
114.7	1	1	1	1	1	1	1	1	1	1	1	1	1	1	1	1	1
117.8	1	1	1	1	1	1	1	1	1	1	1	1	1	1	1	1	1
121.4	1	1	1	1	1	1	1	1	1	1	1	1	1	1	1	1	1
125.6	1	1	1	1	1	1	1	1	1	1	1	1	1	1	1	1	1
126.8	1	1	1	1	1	1	1	1	1	1	1	1	1	1	1	1	1
125	1	1	1	1	1	1	1	1	1	1	1	1	1	1	1	1	1
124.3	1	1	1	1	1	1	1	1	1	1	1	1	1	1	1	1	1
122.5	1	1	1	1	1	1	1	1	1	1	1	1	1	1	1	1	1
119.6	1	1	1	1	1	1	1	1	1	1	1	1	1	1	1	1	1
127.4	1	1	1	1	1	1	1	1	1	1	1	1	1	1	1	1	1

## Sheet: Heat maps
	XLSTAT 2014.5.03 - Heat maps - on 31/05/2023 at 07:38:50
	Features/Individuals table: Workbook = sandalwood.xlsx / Sheet = Sheet2 / Range = Sheet2!$D$2:$U$50 / 48 rows and 18 columns
	Center: Yes
	Reduce: Yes

## Sheet: Correlation tests
	XLSTAT 2014.5.03 - Correlation tests - on 31/05/2023 at 07:37:58
	Observations/variables table: Workbook = sandalwood.xlsx / Sheet = Sheet2 / Range = Sheet2!$D$2:$U$50 / 48 rows and 18 columns
	Type of correlation: Spearman
	Summary statistics:
	Variable	Observations	Obs. with missing data	Obs. without missing data	Minimum	Maximum	Mean	Std. deviation
	CFW	48	0	48	101	150	121.33	15.7164
	CDW	48	0	48	21	49	31.3792	7.57625
	CMC	48	0	48	47.5	85	63.2292	11.7063
	nosb/c	48	0	48	14.3	24.87	19.6038	2.6946
	TFC	48	0	48	0.023	0.098	0.0562917	0.0225992
	TPC	48	0	48	10.34	19.22	14.0711	2.32183
	TSC	48	0	48	3.78	9.23	6.19917	1.75744
	TTTC	48	0	48	6.11	14.99	9.84108	2.32183
	TiAC	48	0	48	0.123	0.604	0.327354	0.168955
	t.flavanols	48	0	48	2.129	7.579	4.54817	1.75744
	Tctc	48	0	48	0.57	3.49	1.63938	0.936804
	PAL	48	0	48	2.734	6.473	4.07587	1.29506
	SOD	48	0	48	1.204	4.962	2.47875	1.42755
	POD	48	0	48	1.531	4.574	2.53154	1.10463
	CAT	48	0	48	0.501	3.163	1.41354	1.01461
	dpph	48	0	48	23	87	53.1667	18.3156
	toco ug/g FW	48	0	48	3.32	4.97	4.03931	0.432282
	antho mg/100 g FW	48	0	48	3.08	6	4.14938	0.936804
	Correlation matrix (Spearman):
	Variables	CFW	CDW	CMC	nosb/c	TFC	TPC	TSC	TTTC	TiAC	t.flavanols	Tctc	PAL	SOD	POD	CAT	dpph	toco ug/g FW	antho mg/100 g FW
	CFW	1	0.981455	0.983331	0.98219	0.995384	0.989956	0.982056	0.989956	0.993647	0.982056	0.987349	0.967286	0.923012	0.948204	0.932213	0.983028	0.950729	0.987349
	CDW	0.981455	1	0.994435	0.943909	0.982868	0.994652	0.945027	0.994652	0.987946	0.945027	0.966173	0.969919	0.903847	0.920732	0.917879	0.957829	0.910606	0.966173
	CMC	0.983331	0.994435	1	0.946794	0.983223	0.997096	0.94764	0.997096	0.990092	0.94764	0.965906	0.971606	0.900114	0.918354	0.915447	0.95797	0.915857	0.965906
	nosb/c	0.98219	0.943909	0.946794	1	0.981973	0.958633	0.992834	0.958633	0.972447	0.992834	0.985097	0.94796	0.941341	0.963735	0.94533	0.987836	0.978692	0.985097
	TFC	0.995384	0.982868	0.983223	0.981973	1	0.990038	0.980319	0.990038	0.994815	0.980319	0.99115	0.9722	0.929964	0.9513	0.941499	0.986667	0.952848	0.99115
	TPC	0.989956	0.994652	0.997096	0.958633	0.990038	1	0.957551	1	0.994952	0.957551	0.974649	0.977146	0.911711	0.930601	0.927369	0.967476	0.926476	0.974649
	TSC	0.982056	0.945027	0.94764	0.992834	0.980319	0.957551	1	0.957551	0.971391	1	0.986591	0.937161	0.927259	0.953695	0.932387	0.990144	0.971012	0.986591
	TTTC	0.989956	0.994652	0.997096	0.958633	0.990038	1	0.957551	1	0.994952	0.957551	0.974649	0.977146	0.911711	0.930601	0.927369	0.967476	0.926476	0.974649
	TiAC	0.993647	0.987946	0.990092	0.972447	0.994815	0.994952	0.971391	0.994952	1	0.971391	0.985396	0.974131	0.920987	0.941154	0.934529	0.978198	0.940204	0.985396
	t.flavanols	0.982056	0.945027	0.94764	0.992834	0.980319	0.957551	1	0.957551	0.971391	1	0.986591	0.937161	0.927259	0.953695	0.932387	0.990144	0.971012	0.986591
	Tctc	0.987349	0.966173	0.965906	0.985097	0.99115	0.974649	0.986591	0.974649	0.985396	0.986591	1	0.960964	0.940963	0.962352	0.951574	0.992995	0.964632	1
	PAL	0.967286	0.969919	0.971606	0.94796	0.9722	0.977146	0.937161	0.977146	0.974131	0.937161	0.960964	1	0.942211	0.953666	0.960858	0.945126	0.93871	0.960964
	SOD	0.923012	0.903847	0.900114	0.941341	0.929964	0.911711	0.927259	0.911711	0.920987	0.927259	0.940963	0.942211	1	0.983959	0.984068	0.933538	0.96477	0.940963
	POD	0.948204	0.920732	0.918354	0.963735	0.9513	0.930601	0.953695	0.930601	0.941154	0.953695	0.962352	0.953666	0.983959	1	0.986755	0.954552	0.979101	0.962352
	CAT	0.932213	0.917879	0.915447	0.94533	0.941499	0.927369	0.932387	0.927369	0.934529	0.932387	0.951574	0.960858	0.984068	0.986755	1	0.940785	0.967077	0.951574
	dpph	0.983028	0.957829	0.95797	0.987836	0.986667	0.967476	0.990144	0.967476	0.978198	0.990144	0.992995	0.945126	0.933538	0.954552	0.940785	1	0.966117	0.992995
	toco ug/g FW	0.950729	0.910606	0.915857	0.978692	0.952848	0.926476	0.971012	0.926476	0.940204	0.971012	0.964632	0.93871	0.96477	0.979101	0.967077	0.966117	1	0.964632
	antho mg/100 g FW	0.987349	0.966173	0.965906	0.985097	0.99115	0.974649	0.986591	0.974649	0.985396	0.986591	1	0.960964	0.940963	0.962352	0.951574	0.992995	0.964632	1
	Values in bold are different from 0 with a significance level alpha=0.05
	Correlation maps:

[truncated: 2 more sheets: Correlation tab;le , PCA]
